# Supplementary material for: Assessment of surgical capacity in Chiapas, Mexico: a cross-sectional study of the public and private sector
Source: HighWire-hosted journal article supplement (doi:10.1136/bmjopen-2020-044160), 2021-07-01
Supplement: bmjopen-2020-044160supp001_data_supplement.pdf [file bmjopen-2020-044160supp001_data_supplement.pdf]

## Appendix A

| GENERAL QUESTIONS                                                           |                                                                                                                                                                                                                                                |
|-----------------------------------------------------------------------------|------------------------------------------------------------------------------------------------------------------------------------------------------------------------------------------------------------------------------------------------|
| State / Jurisdiction / Municipality:                                        |                                                                                                                                                                                                                                                |
| Name of healthcare facility:                                                |                                                                                                                                                                                                                                                |
| Address of healthcare facility:                                             |                                                                                                                                                                                                                                                |
| Phone number and email of healthcare facility:                              |                                                                                                                                                                                                                                                |
| Date of data collection (dd/mm/yyyy):                                       |                                                                                                                                                                                                                                                |
| Name and professional title of staff filling out form::                     |                                                                                                                                                                                                                                                |
| Contact information of staff completing this assessment (phone and email):: |                                                                                                                                                                                                                                                |
| Level of facility being evaluated                                           | <input type="checkbox"/> Basic Community Hospital<br><input type="checkbox"/> Integral Community Hospital<br><input type="checkbox"/> General Hospital<br><input type="checkbox"/> Regional Hospital<br><input type="checkbox"/> Not specified |
| Type of facility being evaluated (all that apply)                           | <input type="checkbox"/> Public <input type="checkbox"/> Private <input type="checkbox"/> NGO <input type="checkbox"/> Mission <input type="checkbox"/> Other:                                                                                 |
| Is surgical care provided with surgical missions or campaigns?              | <input type="checkbox"/> Yes, all surgical care <input type="checkbox"/> Yes, some surgical care <input type="checkbox"/> No                                                                                                                   |

| INFRASTRUCTURE                                                            |                                                                                                                                      |                                                                                                                              |
|---------------------------------------------------------------------------|--------------------------------------------------------------------------------------------------------------------------------------|------------------------------------------------------------------------------------------------------------------------------|
| General Infrastructure - How often is this item available and functional? |                                                                                                                                      |                                                                                                                              |
| Electricity/operational power generator                                   | <input type="checkbox"/> 0 (Never)<br><input type="checkbox"/> 26-50% (Sometimes)<br><input type="checkbox"/> 76-99% (Almost always) | <input type="checkbox"/> 1-25% (Rarely)<br><input type="checkbox"/> 51-75% (Often)<br><input type="checkbox"/> 100% (Always) |
| Running water                                                             | <input type="checkbox"/> 0 (Never)<br><input type="checkbox"/> 26-50% (Sometimes)<br><input type="checkbox"/> 76-99% (Almost always) | <input type="checkbox"/> 1-25% (Rarely)<br><input type="checkbox"/> 51-75% (Often)<br><input type="checkbox"/> 100% (Always) |
| Internet                                                                  | <input type="checkbox"/> 0 (Never)<br><input type="checkbox"/> 26-50% (Sometimes)                                                    | <input type="checkbox"/> 1-25% (Rarely)<br><input type="checkbox"/> 51-75% (Often)                                           |

|                                                                                                     |                                                 |                                         |
|-----------------------------------------------------------------------------------------------------|-------------------------------------------------|-----------------------------------------|
|                                                                                                     | <input type="checkbox"/> 76-99% (Almost always) | <input type="checkbox"/> 100% (Always)  |
| Oxygen                                                                                              | <input type="checkbox"/> 0 (Never)              | <input type="checkbox"/> 1-25% (Rarely) |
|                                                                                                     | <input type="checkbox"/> 26-50% (Sometimes)     | <input type="checkbox"/> 51-75% (Often) |
|                                                                                                     | <input type="checkbox"/> 76-99% (Almost always) | <input type="checkbox"/> 100% (Always)  |
| <b>Last 30 days or monthly average</b>                                                              |                                                 |                                         |
| Total number of inpatient hospital beds                                                             | Census:                                         | Non-census:                             |
| Total number of surgical beds                                                                       | Census:                                         | Non-census:                             |
| Total number of post-anaesthesia care beds                                                          | Census:                                         | Non-census:                             |
| Total number of functioning operating rooms (major and minor)                                       | #                                               |                                         |
| Total number of advanced care/ICU beds                                                              | Census:                                         | Non-census:                             |
| Total number of functional ventilators in the ICU                                                   | #                                               |                                         |
| Total number of admissions in a year                                                                | #                                               |                                         |
| Total number of outpatients seen in a year                                                          | #                                               |                                         |
| <b>Radiology: How often do you have access to functioning radiology equipment?</b>                  |                                                 |                                         |
| X-ray machine                                                                                       | <input type="checkbox"/> 0 (Never)              | <input type="checkbox"/> 1-25% (Rarely) |
|                                                                                                     | <input type="checkbox"/> 26-50% (Sometimes)     | <input type="checkbox"/> 51-75% (Often) |
|                                                                                                     | <input type="checkbox"/> 76-99% (Almost always) | <input type="checkbox"/> 100% (Always)  |
| Ultrasound                                                                                          | <input type="checkbox"/> 0 (Never)              | <input type="checkbox"/> 1-25% (Rarely) |
|                                                                                                     | <input type="checkbox"/> 26-50% (Sometimes)     | <input type="checkbox"/> 51-75% (Often) |
|                                                                                                     | <input type="checkbox"/> 76-99% (Almost always) | <input type="checkbox"/> 100% (Always)  |
| CT scanner                                                                                          | <input type="checkbox"/> 0 (Never)              | <input type="checkbox"/> 1-25% (Rarely) |
|                                                                                                     | <input type="checkbox"/> 26-50% (Sometimes)     | <input type="checkbox"/> 51-75% (Often) |
|                                                                                                     | <input type="checkbox"/> 76-99% (Almost always) | <input type="checkbox"/> 100% (Always)  |
| MRI scanner                                                                                         | <input type="checkbox"/> 0 (Never)              | <input type="checkbox"/> 1-25% (Rarely) |
|                                                                                                     | <input type="checkbox"/> 26-50% (Sometimes)     | <input type="checkbox"/> 51-75% (Often) |
|                                                                                                     | <input type="checkbox"/> 76-99% (Almost always) | <input type="checkbox"/> 100% (Always)  |
| <b>Blood Supply</b>                                                                                 |                                                 |                                         |
| How often are you able to administer a blood transfusion within 2 hours in your facility?           | <input type="checkbox"/> 0 (Never)              | <input type="checkbox"/> 1-25% (Rarely) |
|                                                                                                     | <input type="checkbox"/> 26-50% (Sometimes)     | <input type="checkbox"/> 51-75% (Often) |
|                                                                                                     | <input type="checkbox"/> 76-99% (Almost always) | <input type="checkbox"/> 100% (Always)  |
| <b>Laboratory</b>                                                                                   |                                                 |                                         |
| How often is the lab able to run a Complete Blood Count (haemoglobin, haematocrit, WBC, platelets)? | <input type="checkbox"/> 0 (Never)              | <input type="checkbox"/> 1-25% (Rarely) |
|                                                                                                     | <input type="checkbox"/> 26-50% (Sometimes)     | <input type="checkbox"/> 51-75% (Often) |
|                                                                                                     | <input type="checkbox"/> 76-99% (Almost always) | <input type="checkbox"/> 100% (Always)  |
| How often is the lab able to run a chemistry panel (BUN, creatinine, Na, K, etc.)?                  | <input type="checkbox"/> 0 (Never)              | <input type="checkbox"/> 1-25% (Rarely) |
|                                                                                                     | <input type="checkbox"/> 26-50% (Sometimes)     | <input type="checkbox"/> 51-75% (Often) |
|                                                                                                     | <input type="checkbox"/> 76-99% (Almost always) | <input type="checkbox"/> 100% (Always)  |
| How often is the lab able to run coagulation studies (PT, PTT, BT, INR)?                            | <input type="checkbox"/> 0 (Never)              | <input type="checkbox"/> 1-25% (Rarely) |
|                                                                                                     | <input type="checkbox"/> 26-50% (Sometimes)     | <input type="checkbox"/> 51-75% (Often) |
|                                                                                                     | <input type="checkbox"/> 76-99% (Almost always) | <input type="checkbox"/> 100% (Always)  |

|                                                                                                       |                                                                                                                                                                                                                                                             |
|-------------------------------------------------------------------------------------------------------|-------------------------------------------------------------------------------------------------------------------------------------------------------------------------------------------------------------------------------------------------------------|
| How often is the lab able to do a urinalysis?                                                         | <input type="checkbox"/> 0 (Never) <input type="checkbox"/> 1-25% (Rarely)<br><input type="checkbox"/> 26-50% (Sometimes) <input type="checkbox"/> 51-75% (Often)<br><input type="checkbox"/> 76-99% (Almost always) <input type="checkbox"/> 100% (Always) |
| How often are you able to screen for an infectious panel (HIV, hepatitis virus)?                      | <input type="checkbox"/> 0 (Never) <input type="checkbox"/> 1-25% (Rarely)<br><input type="checkbox"/> 26-50% (Sometimes) <input type="checkbox"/> 51-75% (Often)<br><input type="checkbox"/> 76-99% (Almost always) <input type="checkbox"/> 100% (Always) |
| <b>Access and referral systems</b>                                                                    |                                                                                                                                                                                                                                                             |
| What is the population of the district(s) served by this facility?                                    |                                                                                                                                                                                                                                                             |
| What is the true coverage area of this facility?                                                      |                                                                                                                                                                                                                                                             |
| What percentage of your patients can reach the hospital within 2 hours of travel?                     | <input type="checkbox"/> 0 (Never) <input type="checkbox"/> 1-25% (Rarely)<br><input type="checkbox"/> 26-50% (Sometimes) <input type="checkbox"/> 51-75% (Often)<br><input type="checkbox"/> 76-99% (Almost always) <input type="checkbox"/> 100% (Always) |
| Total number of patients that you refer for surgical intervention to a higher level facility per year | #                                                                                                                                                                                                                                                           |

| <b>SERVICE DELIVERY</b>                                                    |                                 |
|----------------------------------------------------------------------------|---------------------------------|
| <b>Surgical volume</b>                                                     |                                 |
| How many of the following procedures have been performed at this facility? | Last 30 days or monthly average |
| Total number of surgeries                                                  | #                               |
| Number of cesarean deliveries                                              |                                 |
| Number of laparotomies                                                     | #                               |
| Number of open fracture repairs                                            | #                               |
| Number of pediatric surgeries (<15 years)                                  | #                               |
| Number of emergent / urgent (not scheduled) cases                          | #                               |
| <b>Rural hospital or health center / Basic Community Hospital</b>          |                                 |
| 1. Normal obstetric delivery                                               | #                               |
| 2. Management of non-displaced fractures                                   | #                               |
| 3. Drainage of superficial abscess                                         | #                               |
| 4. Suturing laceration                                                     | #                               |
| 5. Wound debridement                                                       | #                               |
| 6. Biopsy (lymph node, mass, other)                                        | #                               |
| 7. Removal of foreign body (throat/eye/ear/nose)                           | #                               |
| 8. Male circumcision                                                       | #                               |

| <b>Procedures / General Hospital</b>                                             |   |
|----------------------------------------------------------------------------------|---|
| How many of the following procedures have been performed at this facility?       |   |
| <b>Obstetrics and Gynecology</b>                                                 |   |
| 1. Caesarean birth                                                               | # |
| 2. Vacuum extraction/forceps delivery                                            | # |
| 3. Hysterectomy                                                                  | # |
| 4. Tubal ligation                                                                | # |
| 5. Manual vacuum aspiration and dilation and curettage                           | # |
| 6. Ectopic pregnancy                                                             | # |
| 8. Inspection with acetic acid, cryotherapy for cervical lesions                 |   |
| <b>General Surgery</b>                                                           |   |
| 10. Appendectomy                                                                 | # |
| 11. Gallbladder disease                                                          | # |
| 14. Hernia, including incarceration                                              | # |
| 13. Bowel obstruction                                                            | # |
| 14. Colostomy/ileostomy                                                          | # |
| 15. Vasectomy                                                                    | # |
| 16. Repair of intestinal perforations                                            | # |
| 15. Hydrocelectomy                                                               |   |
| 16. Relief of urinary obstruction                                                |   |
| <b>Injury / Orthopedic</b>                                                       |   |
| 17. Fracture reduction                                                           | # |
| 18. Irrigation and debridement of open fractures                                 | # |
| 19. Trauma laparotomy                                                            | # |
| 20. Placement of external fixator                                                | # |
| 21. Tube thoracostomy                                                            | # |
| 22. Amputations                                                                  | # |
| 23. Escharotomy/fasciotomy                                                       | # |
| 24. Skin grafting                                                                | # |
| 25. Burr hole                                                                    | # |
| 26. Resuscitation with advanced life support measures, including surgical airway | # |
| 27. Drainage of septic arthritis                                                 | # |
| 28. Debridement of osteomyelitis                                                 | # |
| <b>Secondary or tertiary hospital / Regional Hospital</b>                        |   |
| 1. Repair obstetric fistula                                                      | # |
| 2. Repair of cleft lip and palate                                                | # |
| 3. Repair of club foot                                                           | # |
| 4. Shunt for hydrocephalus                                                       | # |
| 5. Repair of anorectal malformation and Hirschsprung's Disease                   | # |

|                                                                                                                            |                                                                                                                                                                                                                                                             |
|----------------------------------------------------------------------------------------------------------------------------|-------------------------------------------------------------------------------------------------------------------------------------------------------------------------------------------------------------------------------------------------------------|
| 6. Cataract extraction and insertion of intraocular lens                                                                   | #                                                                                                                                                                                                                                                           |
| 7. Eyelid surgery for trachoma                                                                                             | #                                                                                                                                                                                                                                                           |
| <b>Quality and Safety</b>                                                                                                  |                                                                                                                                                                                                                                                             |
| What is the average number of post-operative, in-hospital deaths per year?                                                 | #                                                                                                                                                                                                                                                           |
| How often is the WHO surgical safety checklist utilized in the operating rooms?                                            | <input type="checkbox"/> 0 (Never) <input type="checkbox"/> 1-25% (Rarely)<br><input type="checkbox"/> 26-50% (Sometimes) <input type="checkbox"/> 51-75% (Often)<br><input type="checkbox"/> 76-99% (Almost always) <input type="checkbox"/> 100% (Always) |
| How often is pulse oximetry used in the operating rooms?                                                                   | <input type="checkbox"/> 0 (Never) <input type="checkbox"/> 1-25% (Rarely)<br><input type="checkbox"/> 26-50% (Sometimes) <input type="checkbox"/> 51-75% (Often)<br><input type="checkbox"/> 76-99% (Almost always) <input type="checkbox"/> 100% (Always) |
| <b>Operating Room Equipment and Supplies – How often are the following equipment available and functional for surgery?</b> |                                                                                                                                                                                                                                                             |
| Total number of functional anaesthesia machines in the ORs                                                                 | #                                                                                                                                                                                                                                                           |
| Pulse oximetry                                                                                                             | #                                                                                                                                                                                                                                                           |
| Adult oropharyngeal airway                                                                                                 | <input type="checkbox"/> 0 (Never) <input type="checkbox"/> 1-25% (Rarely) <input type="checkbox"/> 26-50% (Sometimes) <input type="checkbox"/> 51-75% (Often)<br><input type="checkbox"/> 76-99% (Almost always) <input type="checkbox"/> 100% (Always)    |
| Pediatric oropharyngeal airway                                                                                             | <input type="checkbox"/> 0 (Never) <input type="checkbox"/> 1-25% (Rarely) <input type="checkbox"/> 26-50% (Sometimes) <input type="checkbox"/> 51-75% (Often)<br><input type="checkbox"/> 76-99% (Almost always) <input type="checkbox"/> 100% (Always)    |
| Adult endotracheal tube                                                                                                    | <input type="checkbox"/> 0 (Never) <input type="checkbox"/> 1-25% (Rarely) <input type="checkbox"/> 26-50% (Sometimes) <input type="checkbox"/> 51-75% (Often)<br><input type="checkbox"/> 76-99% (Almost always) <input type="checkbox"/> 100% (Always)    |
| Pediatric endotracheal tube                                                                                                | <input type="checkbox"/> 0 (Never) <input type="checkbox"/> 1-25% (Rarely) <input type="checkbox"/> 26-50% (Sometimes) <input type="checkbox"/> 51-75% (Often)<br><input type="checkbox"/> 76-99% (Almost always) <input type="checkbox"/> 100% (Always)    |
| Adult laryngoscope                                                                                                         | <input type="checkbox"/> 0 (Never) <input type="checkbox"/> 1-25% (Rarely) <input type="checkbox"/> 26-50% (Sometimes) <input type="checkbox"/> 51-75% (Often)<br><input type="checkbox"/> 76-99% (Almost always) <input type="checkbox"/> 100% (Always)    |
| Pediatric laryngoscope                                                                                                     | <input type="checkbox"/> 0 (Never) <input type="checkbox"/> 1-25% (Rarely) <input type="checkbox"/> 26-50% (Sometimes) <input type="checkbox"/> 51-75% (Often)<br><input type="checkbox"/> 76-99% (Almost always) <input type="checkbox"/> 100% (Always)    |
| Adult facemask bag valve                                                                                                   | <input type="checkbox"/> 0 (Never) <input type="checkbox"/> 1-25% (Rarely) <input type="checkbox"/> 26-50% (Sometimes) <input type="checkbox"/> 51-75% (Often)<br><input type="checkbox"/> 76-99% (Almost always) <input type="checkbox"/> 100% (Always)    |
| Paediatric facemask bag valve                                                                                              | <input type="checkbox"/> 0 (Never) <input type="checkbox"/> 1-25% (Rarely) <input type="checkbox"/> 26-50% (Sometimes) <input type="checkbox"/> 51-75% (Often)<br><input type="checkbox"/> 76-99% (Almost always) <input type="checkbox"/> 100% (Always)    |
| Difficult airway kit (LMA)                                                                                                 | <input type="checkbox"/> 0 (Never) <input type="checkbox"/> 1-25% (Rarely) <input type="checkbox"/> 26-50% (Sometimes) <input type="checkbox"/> 51-75% (Often)<br><input type="checkbox"/> 76-99% (Almost always) <input type="checkbox"/> 100% (Always)    |
| Adult Magill forceps                                                                                                       | <input type="checkbox"/> 0 (Never) <input type="checkbox"/> 1-25% (Rarely) <input type="checkbox"/> 26-50% (Sometimes) <input type="checkbox"/> 51-75% (Often)<br><input type="checkbox"/> 76-99% (Almost always) <input type="checkbox"/> 100% (Always)    |
| Pediatric Magill forceps                                                                                                   | <input type="checkbox"/> 0 (Never) <input type="checkbox"/> 1-25% (Rarely) <input type="checkbox"/> 26-50% (Sometimes) <input type="checkbox"/> 51-75% (Often)<br><input type="checkbox"/> 76-99% (Almost always) <input type="checkbox"/> 100% (Always)    |
| Blood pressure monitor or cuff                                                                                             | <input type="checkbox"/> 0 (Never) <input type="checkbox"/> 1-25% (Rarely) <input type="checkbox"/> 26-50% (Sometimes) <input type="checkbox"/> 51-75% (Often)<br><input type="checkbox"/> 76-99% (Almost always) <input type="checkbox"/> 100% (Always)    |
| Pulse oximeter                                                                                                             | <input type="checkbox"/> 0 (Never) <input type="checkbox"/> 1-25% (Rarely) <input type="checkbox"/> 26-50% (Sometimes) <input type="checkbox"/> 51-75% (Often)<br><input type="checkbox"/> 76-99% (Almost always) <input type="checkbox"/> 100% (Always)    |

|                        |                                                                                                                                                                                                                                                          |
|------------------------|----------------------------------------------------------------------------------------------------------------------------------------------------------------------------------------------------------------------------------------------------------|
| Stethoscope            | <input type="checkbox"/> 0 (Never) <input type="checkbox"/> 1-25% (Rarely) <input type="checkbox"/> 26-50% (Sometimes) <input type="checkbox"/> 51-75% (Often)<br><input type="checkbox"/> 76-99% (Almost always) <input type="checkbox"/> 100% (Always) |
| Suction apparatus      | <input type="checkbox"/> 0 (Never) <input type="checkbox"/> 1-25% (Rarely) <input type="checkbox"/> 26-50% (Sometimes) <input type="checkbox"/> 51-75% (Often)<br><input type="checkbox"/> 76-99% (Almost always) <input type="checkbox"/> 100% (Always) |
| Thermometer            | <input type="checkbox"/> 0 (Never) <input type="checkbox"/> 1-25% (Rarely) <input type="checkbox"/> 26-50% (Sometimes) <input type="checkbox"/> 51-75% (Often)<br><input type="checkbox"/> 76-99% (Almost always) <input type="checkbox"/> 100% (Always) |
| Nasogastric Tube       | <input type="checkbox"/> 0 (Never) <input type="checkbox"/> 1-25% (Rarely) <input type="checkbox"/> 26-50% (Sometimes) <input type="checkbox"/> 51-75% (Often)<br><input type="checkbox"/> 76-99% (Almost always) <input type="checkbox"/> 100% (Always) |
| Light source           | <input type="checkbox"/> 0 (Never) <input type="checkbox"/> 1-25% (Rarely) <input type="checkbox"/> 26-50% (Sometimes) <input type="checkbox"/> 51-75% (Often)<br><input type="checkbox"/> 76-99% (Almost always) <input type="checkbox"/> 100% (Always) |
| Chest tube             | <input type="checkbox"/> 0 (Never) <input type="checkbox"/> 1-25% (Rarely) <input type="checkbox"/> 26-50% (Sometimes) <input type="checkbox"/> 51-75% (Often)<br><input type="checkbox"/> 76-99% (Almost always) <input type="checkbox"/> 100% (Always) |
| Electrocautery         | <input type="checkbox"/> 0 (Never) <input type="checkbox"/> 1-25% (Rarely) <input type="checkbox"/> 26-50% (Sometimes) <input type="checkbox"/> 51-75% (Often)<br><input type="checkbox"/> 76-99% (Almost always) <input type="checkbox"/> 100% (Always) |
| Autoclave / Sterilizer | <input type="checkbox"/> 0 (Never) <input type="checkbox"/> 1-25% (Rarely) <input type="checkbox"/> 26-50% (Sometimes) <input type="checkbox"/> 51-75% (Often)<br><input type="checkbox"/> 76-99% (Almost always) <input type="checkbox"/> 100% (Always) |
| Forceps                | <input type="checkbox"/> 0 (Never) <input type="checkbox"/> 1-25% (Rarely) <input type="checkbox"/> 26-50% (Sometimes) <input type="checkbox"/> 51-75% (Often)<br><input type="checkbox"/> 76-99% (Almost always) <input type="checkbox"/> 100% (Always) |
| Syringes with needles  | <input type="checkbox"/> 0 (Never) <input type="checkbox"/> 1-25% (Rarely) <input type="checkbox"/> 26-50% (Sometimes) <input type="checkbox"/> 51-75% (Often)<br><input type="checkbox"/> 76-99% (Almost always) <input type="checkbox"/> 100% (Always) |
| Scalpel                | <input type="checkbox"/> 0 (Never) <input type="checkbox"/> 1-25% (Rarely) <input type="checkbox"/> 26-50% (Sometimes) <input type="checkbox"/> 51-75% (Often)<br><input type="checkbox"/> 76-99% (Almost always) <input type="checkbox"/> 100% (Always) |
| Scissors               | <input type="checkbox"/> 0 (Never) <input type="checkbox"/> 1-25% (Rarely) <input type="checkbox"/> 26-50% (Sometimes) <input type="checkbox"/> 51-75% (Often)<br><input type="checkbox"/> 76-99% (Almost always) <input type="checkbox"/> 100% (Always) |
| Needle holder          | <input type="checkbox"/> 0 (Never) <input type="checkbox"/> 1-25% (Rarely) <input type="checkbox"/> 26-50% (Sometimes) <input type="checkbox"/> 51-75% (Often)<br><input type="checkbox"/> 76-99% (Almost always) <input type="checkbox"/> 100% (Always) |
| Retractor              | <input type="checkbox"/> 0 (Never) <input type="checkbox"/> 1-25% (Rarely) <input type="checkbox"/> 26-50% (Sometimes) <input type="checkbox"/> 51-75% (Often)<br><input type="checkbox"/> 76-99% (Almost always) <input type="checkbox"/> 100% (Always) |
| Sterile gloves         | <input type="checkbox"/> 0 (Never) <input type="checkbox"/> 1-25% (Rarely) <input type="checkbox"/> 26-50% (Sometimes) <input type="checkbox"/> 51-75% (Often)<br><input type="checkbox"/> 76-99% (Almost always) <input type="checkbox"/> 100% (Always) |
| Urinary catheters      | <input type="checkbox"/> 0 (Never) <input type="checkbox"/> 1-25% (Rarely) <input type="checkbox"/> 26-50% (Sometimes) <input type="checkbox"/> 51-75% (Often)<br><input type="checkbox"/> 76-99% (Almost always) <input type="checkbox"/> 100% (Always) |
| Tourniquet             | <input type="checkbox"/> 0 (Never) <input type="checkbox"/> 1-25% (Rarely) <input type="checkbox"/> 26-50% (Sometimes) <input type="checkbox"/> 51-75% (Often)<br><input type="checkbox"/> 76-99% (Almost always) <input type="checkbox"/> 100% (Always) |
| Face masks             | <input type="checkbox"/> 0 (Never) <input type="checkbox"/> 1-25% (Rarely) <input type="checkbox"/> 26-50% (Sometimes) <input type="checkbox"/> 51-75% (Often)<br><input type="checkbox"/> 76-99% (Almost always) <input type="checkbox"/> 100% (Always) |
| Gowns                  | <input type="checkbox"/> 0 (Never) <input type="checkbox"/> 1-25% (Rarely) <input type="checkbox"/> 26-50% (Sometimes) <input type="checkbox"/> 51-75% (Often)<br><input type="checkbox"/> 76-99% (Almost always) <input type="checkbox"/> 100% (Always) |
| Disinfectant hand wash | <input type="checkbox"/> 0 (Never) <input type="checkbox"/> 1-25% (Rarely) <input type="checkbox"/> 26-50% (Sometimes) <input type="checkbox"/> 51-75% (Often)<br><input type="checkbox"/> 76-99% (Almost always) <input type="checkbox"/> 100% (Always) |
| Sterilizing skin prep  | <input type="checkbox"/> 0 (Never) <input type="checkbox"/> 1-25% (Rarely) <input type="checkbox"/> 26-50% (Sometimes) <input type="checkbox"/> 51-75% (Often)                                                                                           |

|                                |                                                                                                                                                                                                                                                          |
|--------------------------------|----------------------------------------------------------------------------------------------------------------------------------------------------------------------------------------------------------------------------------------------------------|
|                                | <input type="checkbox"/> 76-99% (Almost always) <input type="checkbox"/> 100% (Always)                                                                                                                                                                   |
| Eye protection                 | <input type="checkbox"/> 0 (Never) <input type="checkbox"/> 1-25% (Rarely) <input type="checkbox"/> 26-50% (Sometimes) <input type="checkbox"/> 51-75% (Often)<br><input type="checkbox"/> 76-99% (Almost always) <input type="checkbox"/> 100% (Always) |
| Sharps disposal container      | <input type="checkbox"/> 0 (Never) <input type="checkbox"/> 1-25% (Rarely) <input type="checkbox"/> 26-50% (Sometimes) <input type="checkbox"/> 51-75% (Often)<br><input type="checkbox"/> 76-99% (Almost always) <input type="checkbox"/> 100% (Always) |
| Non-sterile Examination Gloves | <input type="checkbox"/> 0 (Never) <input type="checkbox"/> 1-25% (Rarely) <input type="checkbox"/> 26-50% (Sometimes) <input type="checkbox"/> 51-75% (Often)<br><input type="checkbox"/> 76-99% (Almost always) <input type="checkbox"/> 100% (Always) |
| Sutures                        | <input type="checkbox"/> 0 (Never) <input type="checkbox"/> 1-25% (Rarely) <input type="checkbox"/> 26-50% (Sometimes) <input type="checkbox"/> 51-75% (Often)<br><input type="checkbox"/> 76-99% (Almost always) <input type="checkbox"/> 100% (Always) |

| <b>WORKFORCE</b>                                                                                                                                                                                                                                                                                                  |           |           |        |
|-------------------------------------------------------------------------------------------------------------------------------------------------------------------------------------------------------------------------------------------------------------------------------------------------------------------|-----------|-----------|--------|
| Surgeon/Anesthesiologist/Obstetrician/Provider Density                                                                                                                                                                                                                                                            |           |           |        |
| <b>Providers</b>                                                                                                                                                                                                                                                                                                  | Full-time | Part-time | Female |
| ¿ What is the total number of surgical specialists?<br>(eg, neurosurgeon, urologist, ophthalmologist, vascular surgeon, otolaryngologist, plastic surgeon, surgical oncologist, cardiothoracic surgeon, general surgeon, obstetrician-gynecologist, orthopedic surgeon, anesthesiologist, pediatric surgeon, etc) | #         | #         | #      |
| Number of general surgeons                                                                                                                                                                                                                                                                                        | #         | #         | #      |
| Number of general surgeons who work in both public and private hospitals                                                                                                                                                                                                                                          | #         | #         | #      |
| Number of paediatric surgeons                                                                                                                                                                                                                                                                                     | #         | #         | #      |
| Number of OBGYNs                                                                                                                                                                                                                                                                                                  | #         | #         | #      |
| Number of OBGYNs who work in both public and private hospitals                                                                                                                                                                                                                                                    | #         | #         | #      |
| Number of anesthesiologists                                                                                                                                                                                                                                                                                       | #         | #         | #      |
| Number of anesthesiologists who work in both public and private hospitals                                                                                                                                                                                                                                         | #         | #         | #      |
| Number of orthopedic surgeons                                                                                                                                                                                                                                                                                     | #         | #         |        |
| Number of orthopedic surgeons who work in both public and private hospitals                                                                                                                                                                                                                                       | #         | #         |        |
| Number of staff who speak an indigenous language                                                                                                                                                                                                                                                                  |           |           |        |
| Staff who identify as indigenous                                                                                                                                                                                                                                                                                  | Yes       | No        |        |
| Number of general doctors providing surgery                                                                                                                                                                                                                                                                       | #         | #         |        |
| Number of general doctors providing C-sections                                                                                                                                                                                                                                                                    | #         | #         |        |
| Number of general doctors providing anesthesia                                                                                                                                                                                                                                                                    | #         | #         |        |
| Number of non-physicians providing surgery                                                                                                                                                                                                                                                                        | #         | #         |        |
| Number of non-physicians providing C-sections                                                                                                                                                                                                                                                                     | #         | #         |        |
| Number of non-physician providing anesthesia                                                                                                                                                                                                                                                                      | #         | #         |        |
| Number of midwives                                                                                                                                                                                                                                                                                                | #         | #         |        |
| Number of nurses on the surgical wards                                                                                                                                                                                                                                                                            | #         | #         |        |

|                                                                              |                                                                                                                                                                                                                                                             |   |
|------------------------------------------------------------------------------|-------------------------------------------------------------------------------------------------------------------------------------------------------------------------------------------------------------------------------------------------------------|---|
| Number of certified radiologists                                             | #                                                                                                                                                                                                                                                           | # |
| Number of certified pathologists                                             | #                                                                                                                                                                                                                                                           | # |
| Number of certified pharmacists                                              | #                                                                                                                                                                                                                                                           | # |
| Number of certified biomedical technicians                                   | #                                                                                                                                                                                                                                                           | # |
| How often is a surgical provider available 24 hours a day?                   | <input type="checkbox"/> 0 (Never) (Rarely) <input type="checkbox"/> 1-25%<br><input type="checkbox"/> 26-50% (Sometimes) (Often) <input type="checkbox"/> 51-75%<br><input type="checkbox"/> 76-99% (Almost always) (Always) <input type="checkbox"/> 100% |   |
| How often is an obstetrics/gynecology provider available 24 hours a day?     | <input type="checkbox"/> 0 (Never) (Rarely) <input type="checkbox"/> 1-25%<br><input type="checkbox"/> 26-50% (Sometimes) (Often) <input type="checkbox"/> 51-75%<br><input type="checkbox"/> 76-99% (Almost always) (Always) <input type="checkbox"/> 100% |   |
| How often is an anesthesia provider available 24 hours a day?                | <input type="checkbox"/> 0 (Never) (Rarely) <input type="checkbox"/> 1-25%<br><input type="checkbox"/> 26-50% (Sometimes) (Often) <input type="checkbox"/> 51-75%<br><input type="checkbox"/> 76-99% (Almost always) (Always) <input type="checkbox"/> 100% |   |
| Continuing medical education                                                 |                                                                                                                                                                                                                                                             |   |
| How often do you offer continuing medical education to your staff each year? | <input type="checkbox"/> Never <input type="checkbox"/> Daily/Weekly <input type="checkbox"/> Monthly <input type="checkbox"/> Quarterly <input type="checkbox"/> Yearly                                                                                    |   |

## INFORMATION MANAGEMENT

### Information systems

|                                                                                                                             |                                                                                                                                                                                                                                                             |
|-----------------------------------------------------------------------------------------------------------------------------|-------------------------------------------------------------------------------------------------------------------------------------------------------------------------------------------------------------------------------------------------------------|
| What is the method of record keeping in your hospital?                                                                      | <input type="checkbox"/> Electronic <input type="checkbox"/> Paper <input type="checkbox"/> Both <input type="checkbox"/> None                                                                                                                              |
| Are there personnel in charge of maintaining medical records?                                                               | <input type="checkbox"/> Yes <input type="checkbox"/> No                                                                                                                                                                                                    |
| Are charts accessible across multiple visits for the same patient?                                                          | <input type="checkbox"/> Yes <input type="checkbox"/> No                                                                                                                                                                                                    |
| How often is data prospectively collected for patient outcomes, such as surgical site infection, post op stroke, DVT, etc.? | <input type="checkbox"/> 0 (Never) (Rarely) <input type="checkbox"/> 1-25%<br><input type="checkbox"/> 26-50% (Sometimes) (Often) <input type="checkbox"/> 51-75%<br><input type="checkbox"/> 76-99% (Almost always) (Always) <input type="checkbox"/> 100% |
| How often is data prospectively collected for post-operative mortality rate?                                                | <input type="checkbox"/> 0 (Never) (Rarely) <input type="checkbox"/> 1-25%<br><input type="checkbox"/> 26-50% (Sometimes) (Often) <input type="checkbox"/> 51-75%<br><input type="checkbox"/> 76-99% (Almost always) (Always) <input type="checkbox"/> 100% |
| How often are you required to report information to the Ministry of Health or an equivalent agency?                         | <input type="checkbox"/> Never <input type="checkbox"/> Daily/Weekly <input type="checkbox"/> Monthly <input type="checkbox"/> Quarterly <input type="checkbox"/> Yearly                                                                                    |
| Do you use telemedicine?                                                                                                    | <input type="checkbox"/> Yes <input type="checkbox"/> No                                                                                                                                                                                                    |



| <b>Research agenda</b>                                                                                              |                                                                                                                                                                                                                                                                                                                                                                                                                                                                                                                                                                                                                                                                                                                                                                                                                                                                                                                                                                                                                                                                                                                                                                                                                                                                                                                                                                                                                              |
|---------------------------------------------------------------------------------------------------------------------|------------------------------------------------------------------------------------------------------------------------------------------------------------------------------------------------------------------------------------------------------------------------------------------------------------------------------------------------------------------------------------------------------------------------------------------------------------------------------------------------------------------------------------------------------------------------------------------------------------------------------------------------------------------------------------------------------------------------------------------------------------------------------------------------------------------------------------------------------------------------------------------------------------------------------------------------------------------------------------------------------------------------------------------------------------------------------------------------------------------------------------------------------------------------------------------------------------------------------------------------------------------------------------------------------------------------------------------------------------------------------------------------------------------------------|
| How often does the hospital participate in quality improvement projects, such as mortality & morbidity conferences? | <input type="checkbox"/> Never <input type="checkbox"/> Daily/Weekly <input type="checkbox"/> Monthly <input type="checkbox"/> Quarterly <input type="checkbox"/> Yearly                                                                                                                                                                                                                                                                                                                                                                                                                                                                                                                                                                                                                                                                                                                                                                                                                                                                                                                                                                                                                                                                                                                                                                                                                                                     |
| How many ongoing research projects does the hospital have?                                                          | #                                                                                                                                                                                                                                                                                                                                                                                                                                                                                                                                                                                                                                                                                                                                                                                                                                                                                                                                                                                                                                                                                                                                                                                                                                                                                                                                                                                                                            |
| How many ongoing research projects does the department of surgery have?                                             | #                                                                                                                                                                                                                                                                                                                                                                                                                                                                                                                                                                                                                                                                                                                                                                                                                                                                                                                                                                                                                                                                                                                                                                                                                                                                                                                                                                                                                            |
| <b>FINANCING</b>                                                                                                    |                                                                                                                                                                                                                                                                                                                                                                                                                                                                                                                                                                                                                                                                                                                                                                                                                                                                                                                                                                                                                                                                                                                                                                                                                                                                                                                                                                                                                              |
| <b>Health financing and accounting</b>                                                                              |                                                                                                                                                                                                                                                                                                                                                                                                                                                                                                                                                                                                                                                                                                                                                                                                                                                                                                                                                                                                                                                                                                                                                                                                                                                                                                                                                                                                                              |
| What percentage of your patients have health insurance?                                                             | <p><b>IMSS</b><br/> <input type="checkbox"/> 0 (Never) <input type="checkbox"/> 1-25% (Rarely) <input type="checkbox"/> 26-50% (Sometimes) <input type="checkbox"/> 51-75% (Often) <input type="checkbox"/> 76-99% (Almost always) <input type="checkbox"/> 100% (Always)</p> <p><b>Seguro Popular</b><br/> <input type="checkbox"/> 0 (Never) <input type="checkbox"/> 1-25% (Rarely) <input type="checkbox"/> 26-50% (Sometimes) <input type="checkbox"/> 51-75% (Often) <input type="checkbox"/> 76-99% (Almost always) <input type="checkbox"/> 100% (Always)</p> <p><b>ISSSTE/ISSTECH</b><br/> <input type="checkbox"/> 0 (Never) <input type="checkbox"/> 1-25% (Rarely) <input type="checkbox"/> 26-50% (Sometimes) <input type="checkbox"/> 51-75% (Often) <input type="checkbox"/> 76-99% (Almost always) <input type="checkbox"/> 100% (Always)</p> <p><b>None</b><br/> <input type="checkbox"/> 0 (Never) <input type="checkbox"/> 1-25% (Rarely) <input type="checkbox"/> 26-50% (Sometimes) <input type="checkbox"/> 51-75% (Often) <input type="checkbox"/> 76-99% (Almost always) <input type="checkbox"/> 100% (Always)</p> <p><b>Private</b><br/> <input type="checkbox"/> 0 (Never) <input type="checkbox"/> 1-25% (Rarely) <input type="checkbox"/> 26-50% (Sometimes) <input type="checkbox"/> 51-75% (Often) <input type="checkbox"/> 76-99% (Almost always) <input type="checkbox"/> 100% (Always)</p> |
| What percentage of patients identify as indigenous?                                                                 |                                                                                                                                                                                                                                                                                                                                                                                                                                                                                                                                                                                                                                                                                                                                                                                                                                                                                                                                                                                                                                                                                                                                                                                                                                                                                                                                                                                                                              |
| <b>Budget allocation</b>                                                                                            |                                                                                                                                                                                                                                                                                                                                                                                                                                                                                                                                                                                                                                                                                                                                                                                                                                                                                                                                                                                                                                                                                                                                                                                                                                                                                                                                                                                                                              |
| What is your total annual hospital operating budget?                                                                | #                                                                                                                                                                                                                                                                                                                                                                                                                                                                                                                                                                                                                                                                                                                                                                                                                                                                                                                                                                                                                                                                                                                                                                                                                                                                                                                                                                                                                            |
| How much of your annual hospital operating budget is allotted to surgery and anesthesia?                            | <input type="checkbox"/> 0% <input type="checkbox"/> 1-25% <input type="checkbox"/> 26-50% <input type="checkbox"/> 51-75% <input type="checkbox"/> 76-99% <input type="checkbox"/> 100%                                                                                                                                                                                                                                                                                                                                                                                                                                                                                                                                                                                                                                                                                                                                                                                                                                                                                                                                                                                                                                                                                                                                                                                                                                     |
| <b>Cost</b>                                                                                                         |                                                                                                                                                                                                                                                                                                                                                                                                                                                                                                                                                                                                                                                                                                                                                                                                                                                                                                                                                                                                                                                                                                                                                                                                                                                                                                                                                                                                                              |
| What is the average out-of-pocket cost to a patient for a C section?                                                | #                                                                                                                                                                                                                                                                                                                                                                                                                                                                                                                                                                                                                                                                                                                                                                                                                                                                                                                                                                                                                                                                                                                                                                                                                                                                                                                                                                                                                            |
| Average out-of-pocket cost to a patient for an open                                                                 | #                                                                                                                                                                                                                                                                                                                                                                                                                                                                                                                                                                                                                                                                                                                                                                                                                                                                                                                                                                                                                                                                                                                                                                                                                                                                                                                                                                                                                            |

|                                                                                                              |   |
|--------------------------------------------------------------------------------------------------------------|---|
| fracture repair?                                                                                             |   |
| Average out-of-pocket cost to a patient for a laparotomy?                                                    | # |
| Average out-of-pocket cost to a patient for a CBC?                                                           | # |
| Average out-of-pocket cost to a patient for a Chest X-ray?                                                   | # |
| Average out-of-pocket cost to a patient for surgery-associated lodging per day?                              | # |
| Average out-of-pocket cost for patient and family transportation per surgery/hospital stay?                  | # |
| Average out-of-pocket cost to a patient for surgery-associated medication per surgery/hospital stay?         | # |
| Average out-of-pocket cost to a patient for other necessities (e.g. laundry/food) per surgery/hospital stay? | # |
